# Supplementary material for: De novo sequencing and comparative transcriptome analysis of adventitious root development induced by exogenous indole-3-butyric acid in cuttings of tetraploid black locust
Source: BMC Genomics. 2017 Feb 16;18:179. doi: 10.1186/s12864-017-3554-4 (PMC5314683; doi:10.1186/s12864-017-3554-4)
Supplement: Additional file 4: — The expression levels of genes that increased continuously in both IBA-treated and CK cuttings. (XLSX 10 kb) [file 12864_2017_3554_MOESM4_ESM.xlsx]

## Sheet: Additional file 4 
Additional file 4 The expression levels of genes that increased continuously in both IBA-treated and CK cuttings.
gene names
ACC oxidase 1
Adenine nucleotide alpha hydrolases-like superfamily protein
ADP-ribosylation factor A1E
alpha carbonic anhydrase 1
alpha/beta-Hydrolases superfamily protein
alpha-amylase-like 2
amino acid permease 2
ARM repeat superfamily protein
basic helix-loop-helix (bHLH) DNA-binding superfamily protein
Bifunctional inhibitor/lipid-transfer protein/seed storage 2S albumin superfamily protein
BURP domain-containing protein
Calcium-binding EF-hand family protein
CAP160 protein
cell wall / vacuolar inhibitor of fructosidase 2
Chaperone DnaJ-domain superfamily protein
C-repeat-binding factor 4
CYCLIN D1;1
ethylene-forming enzyme
exocyst subunit exo70 family protein H7
Galactose oxidase/kelch repeat superfamily protein
Glucose-1-phosphate adenylyltransferase family protein
glutamine-dependent asparagine synthase 1
Granulin repeat cysteine protease family protein
H(+)-ATPase 5
Haloacid dehalogenase-like hydrolase (HAD) superfamily protein
heat shock protein 70
Heavy metal transport/detoxification superfamily protein
Homeodomain-like superfamily protein
HSP20-like chaperones superfamily protein
Hypoxia-responsive family protein
Integrase-type DNA-binding superfamily protein
jasmonate-zim-domain protein 6
Kunitz family trypsin and protease inhibitor protein
Lactoylglutathione lyase / glyoxalase I family protein
Late embryogenesis abundant (LEA) hydroxyproline-rich glycoprotein family
late embryogenesis abundant domain-containing protein / LEA domain-containing protein
LOB domain-containing protein 41
Major facilitator superfamily protein
MATE efflux family protein
NB-ARC domain-containing disease resistance protein
nodulin MtN21 /EamA-like transporter family protein
Nodulin MtN3 family protein
Peroxidase superfamily protein
phloem protein 2-A1
Phosphate-responsive 1 family protein
phospholipase C 2
Plant invertase/pectin methylesterase inhibitor superfamily protein
P-loop containing nucleoside triphosphate hydrolases superfamily protein
Polynucleotidyl transferase, ribonuclease H-like superfamily protein
Protein of unknown function (DUF506)
pyruvate decarboxylase-2
RAS-related nuclear protein-1
Rhodanese/Cell cycle control phosphatase superfamily protein
salt-inducible zinc finger 1
sulfate transporter 3;4
Thiamine pyrophosphate dependent pyruvate decarboxylase family protein
Thioredoxin superfamily protein
TIFY domain/Divergent CCT motif family protein
type one serine/threonine protein phosphatase 4
uclacyanin 3
Wound-responsive family protein
